# Supplementary material
Source: publisher figshare collection journal article supplement (https://future-science-group.figshare.com/ndownloader/files/29092362)
Supplement: Supplementary file 1 [file 29092362]

**Supplementary Resources for The Future of Oncology Care Requires Integration of Patient Engagement and Equity into Practice**

1. Co-Creating Global Capacity for Systematic Patient Engagement, DIA Global Forum

Summary of global training programs/tools and toolkits focused on patient engagement in drug development <https://globalforum.diaglobal.org/issue/april-2021/co-creating-global-capacity-for-systematic-patient-engagement/>

1. *Racial Healing Handbook*

Practical Activities to Help You Challenge Privilege, Confront Systemic Racism, and Engage in Collective Healing <https://www.newharbinger.com/9781684032709/the-racial-healing-handbook/>

1. *Me and White Supremacy*, Layla F. Saad. Workbook “leads readers through a journey of understanding their white privilege and participation in white supremacy, so that they can stop (often unconsciously) inflicting damage on Black, Indigenous and People of Color, and in turn, help other white people do better, too.” https://www.meandwhitesupremacybook.com/
2. *Caste*, Isabel Wilkerson. History of the structure of “unspoken system of human ranking” in today’s society. <https://www.isabelwilkerson.com>
3. *Medical Apartheid,* Harriet Washington. History of medical experimentation on Black Americans. https://www.penguinrandomhouse.com/books/185986/medical-apartheid-by-harriet-a-washington/
4. Sine S, de Bruin A, Getz K. Patient Engagement Initiatives in Clinical Trials: Recent Trends and Implications. *Ther Innov Regul Sci*. doi: 10.1007/s43441-021-00306-8 (2021) (Epub ahead of print).
5. Enhancing the Diversity of Clinical Trial Populations — Eligibility Criteria, Enrollment Practices, and Trial Designs, FDA Guidance for Industry

Recommended approaches that sponsors of clinical trials intended to support a new drug application or a biologics license application can take to increase enrollment of underrepresented populations in their clinical trials. <https://www.fda.gov/regulatory-information/search-fda-guidance-documents/enhancing-diversity-clinical-trial-populations-eligibility-criteria-enrollment-practices-and-trial>

1. 2020, Multi-Regional Clinical Trials Center: Bierer B.E., White S.A., Meloney L.G., Ahmed H.R., Strauss D.H., Clark L.T., (2021). Achieving Diversity, Inclusion, and Equity in Clinical Research Guidance Document Version 1.1. Cambridge and Boston, MA: Multi-Regional Clinical Trials Center of Brigham and Women’s Hospital and Harvard (MRCT Center). Available at: <https://mrctcenter.org/diversity-in-clinical-trials>
2. Women of Color in Pharma (WOCIP). Association for professional development. <https://wocip.org/>
3. National Minority Quality Forum’s Diverse Cancer Communities Working Group.

Open Access article summarizes recommendations from experts around the country who share ‘real world’ strategies that have successfully moved the needle and improved health equity in their communities across the cancer continuum of care, including clinical trials. See chart in appendix for clinical trial practices.

Winkfield KM, Regnante JM, Miller-Sonet E, Gonzalez ET, Freund KM, Doykos PM. Development of an Actionable Framework to Address Cancer Care Disparities in Medically Underserved Populations in the United States: Expert Roundtable Recommendations. *JCO Oncol. Pract.* 17(3), e278–e293 (2021).

1. National Minority Quality Forum. “Late-Stage Diagnosis of Unscreened Cancer: a Health Disparity” (2021). <https://ai-healthnet.com/wp-content/uploads/2021/04/NMQF-GRAIL-Late-Stage-Diagnosis-of-Unscreened-Cancer-Paper-4-26-21.pdf>.
2. Early Detection of Cancer Conference. Virtual event about cancer early detection technlogies <https://www.earlydetectionresearch.com/>
3. 2020 Society for Clinical Research Sites (SCRS)

Diversity Assessment Tool provides guidance for sites to improve their ability to recruit diverse patient populations <https://myscrs.org/learning-campus/diversity-in-clinical-trials/>

1. ASCO and Friends of Cancer Research (FOCR) Clinical Trial Eligibility Criteria

Guidance documents and publications related to expanding key criterial in cancer clinical trials to improve clinical trial representation and care. <https://www.asco.org/research-guidelines/clinical-trials/clinical-trial-eligibility-criteria>

1. Digital Medicine Society (DiME) Playbook

Guide for developing patient-centered digital measures and endpoints <https://playbook.dimesociety.org/>

1. Chapman CH, Gabeau D, Pinnix CC, Deville C Jr, Gibbs IC, Winkfield KM. Why Racial Justice Matters in Radiation Oncology. *Adv Radiat Oncol*. 5(5), 783-790 (2020)

This article is open access.
